# Supplementary material for: Tuberculosis and Risk of Emphysema among U.S. Adults in the NHANES I Epidemiologic Follow-Up Study Cohort, 1971 – 1992
Source: Preprints.org preprint supplement (doi:10.20944/preprints202309.0825.v1), 2023-09-13

Supplemental Figure S1: Decision tree model depicting how prevalent cases of emphysema were determined at baseline, combining self-reporting, chest X-ray findings, and spirometry results.


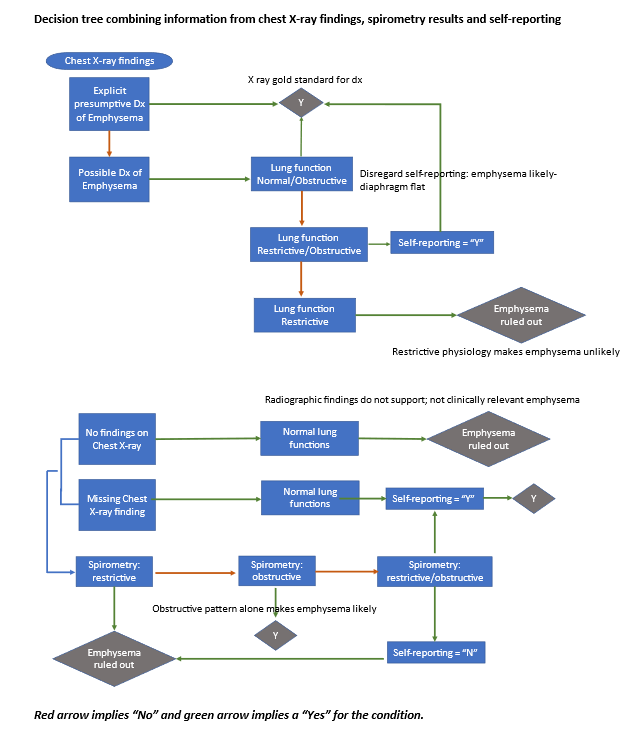

Supplement: Supplementary file 1 [file supplementary]
